# Supplementary material
Source: Springer Nature journal article supplement (https://www.springermedizin.de/resource/supplementary/12889_2011_3477_MOESM1_ESM.pdf/9489140)

■ 6-month regimen ■ 8-month regimen

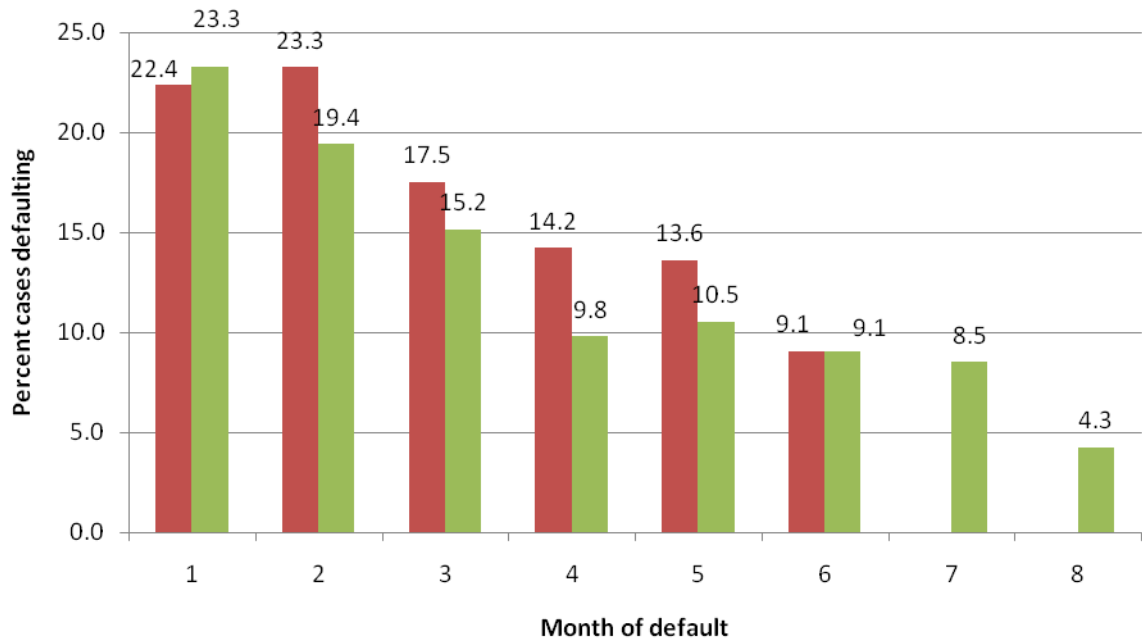

Supplement: MOESM1 [file 9489140]
